# Supplementary material for: Slower environmental change hinders adaptation from standing genetic variation
Source: PubMed Central journal article supplement (PMC6233921; doi:10.1371/journal.pgen.1007731), 2018-11-01
Supplement: pgen.1007731.s020.pdf [file pgen.1007731.s020.pdf]

# inbred lines (and line ids)

| Lineage         | I & II | III & IV | V & X   | # inbred lines (and line ids)                             |                                                                                              |               |
|-----------------|--------|----------|---------|-----------------------------------------------------------|----------------------------------------------------------------------------------------------|---------------|
|                 |        |          |         | GM150                                                     | GM350                                                                                        |               |
| <b>G1</b>       | H4A3   | H3B4     | H3C2    |                                                           | <b>30</b> (1,2,3,4,5,6,7,8,9,13,14,15,17,18,19,21,24,26,27,30,32,34,35,36,39,41,44,46,48,49) |               |
| <b>G2</b>       | H3A4   | H3B3     | H4C2    | <b>16</b> (4,5,10,14,16,19,20,22,27,29,30,31,41,45,46,50) |                                                                                              |               |
| <b>G3</b>       | H3A4   | H3B3     | H5C2    | <b>11</b> (2,3,7,9,13,15,18, 21,25,28,33)                 |                                                                                              |               |
|                 |        |          | H622C2  |                                                           |                                                                                              | <b>1</b> (45) |
| <b>G4 (L11)</b> | H2A2   | H2B2     | H2C3    | <b>1</b> (24)                                             | <b>5</b> (11,12,23,25,50)                                                                    |               |
| <b>G5</b>       | H5A5   | H13B7    | H8C10   | <b>4</b> (23,26,38,44)                                    |                                                                                              |               |
|                 |        | H39B7    | H8C7    |                                                           |                                                                                              | <b>1</b> (37) |
|                 |        | H40B7    |         |                                                           |                                                                                              | <b>1</b> (36) |
| <b>G6</b>       | H4A16  | H3B4     | H3C2    |                                                           | <b>4</b> (20,22,29,38)                                                                       |               |
| <b>G7</b>       | H6A21  | H4B11    | H16C4   | <b>2</b> (37,42)                                          |                                                                                              |               |
|                 | H64A15 | H15B20   | H48C20  | <b>1</b> (40)                                             |                                                                                              |               |
| <b>G8</b>       | H7A7   | H5B14    | H51C11  | <b>2</b> (8,39)                                           |                                                                                              |               |
|                 |        |          | H500C11 | <b>1</b> (6)                                              |                                                                                              |               |
| <b>G9 (L28)</b> | H1A1   | H1B1     | H1C1    | <b>1</b> (1)                                              | <b>1</b> (28)                                                                                |               |
| <b>G10</b>      | H2A2   | H2B6     | H2C3    |                                                           | <b>2</b> (16,40)                                                                             |               |
| <b>G11</b>      | H6A12  | H4B5     | H14C4   | <b>2</b> (11,47)                                          |                                                                                              |               |
| <b>G12</b>      | H6A12  | H4B11    | H10C4   | <b>1</b> (35)                                             | <b>1</b> (43)                                                                                |               |
| <b>G13</b>      | H27A11 | H9B10    | H9C8    | <b>1</b> (32)                                             | <b>1</b> (10)                                                                                |               |
| <b>G14</b>      | H2A55  | H2B2     | H2C3    |                                                           | <b>1</b> (47)                                                                                |               |
|                 | H2A120 |          |         | <b>1</b> (42)                                             |                                                                                              |               |
| <b>G15</b>      | H3A101 | H3B3     | H4C2    | <b>1</b> (12)                                             |                                                                                              |               |
|                 | H165A4 |          |         | <b>1</b> (49)                                             |                                                                                              |               |
| <b>G16</b>      | H2A2   | H7B2     | H2C3    | <b>1</b> (48)                                             |                                                                                              |               |
| <b>G17</b>      | H6A12  | H4B11    | H14C4   | <b>1</b> (17)                                             |                                                                                              |               |
| <b>G18</b>      | H5A5   | H17B7    | H13C7   | <b>1</b> (43)                                             |                                                                                              |               |
| <b>G19</b>      | H6A21  | H4B5     | H16C4   |                                                           | <b>1</b> (31)                                                                                |               |
| <b>G20</b>      | H2A55  | H2B6     | H2C3    |                                                           | <b>1</b> (33)                                                                                |               |
| <b>G21</b>      | H5A5   | H386B7   | H13C7   | <b>1</b> (34)                                             |                                                                                              |               |

Not observed in populations

Minor RWH
